# Supplementary material for: Alexithymia in Adult Autism Clinic Service-Users: Relationships with Sensory Processing Differences and Mental Health
Source: MDPI journal article supplement (doi:10.3390/healthcare11243114), 2023-12-07
Supplement: s1 [file s1]

### Supplementary Materials

**Table S1.** *Diagnostic group characteristic and comparisons.*

| Demographic/clinical measure             | Diagnosed |               |         | Not diagnosed |               |         | Group comparison         |          |           |                      |
|------------------------------------------|-----------|---------------|---------|---------------|---------------|---------|--------------------------|----------|-----------|----------------------|
|                                          | <i>N</i>  | Median (IQR)  | Range   | <i>N</i>      | Median (IQR)  | Range   | $\chi^2$ (df, <i>N</i> ) | <i>p</i> | $\varphi$ |                      |
| Sex: males (females)                     | 105 (48)  | -             | -       | 19 (18)       | -             | -       | 3.92 (1, 190)            | 0.05*    | 0.14      |                      |
| Presence of intellectual disability      | 2         | -             | -       | 5             | -             | -       | Fisher's exact test      | 0.62     | -         |                      |
|                                          | <i>N</i>  | Median (IQR)  | Range   | <i>N</i>      | Median (IQR)  | Range   | <i>U</i>                 | <i>Z</i> | <i>p</i>  | <i>r</i> effect size |
| Age (years)                              | 152       | 32.0 (18.00)  | 18-68   | 37            | 38.0 (21.00)  | 18-65   | 2163.5                   | -2.18    | 0.03*     | 0.16                 |
| AASP total                               | 96        | 176.5 (39.25) | 130-266 | 30            | 162.5 (33.75) | 129-241 | 1714.0                   | 1.57     | 0.12      | 0.14                 |
| Low registration (AASP)                  | 97        | 45.0 (15.50)  | 23-71   | 31            | 40.0 (10.00)  | 30-61   | 1061.0                   | 2.47     | 0.02*     | 0.21                 |
| Sensation seeking (AASP)                 | 96        | 35.0 (11.00)  | 19-55   | 30            | 39.5 (10.25)  | 25-53   | 845.0                    | -3.41    | <0.001*** | 0.30                 |
| Sensory sensitivity (AASP)               | 97        | 48.0 (16.50)  | 21-75   | 31            | 43.0 (10.00)  | 25-68   | 1213.5                   | 1.62     | 0.12      | 0.14                 |
| Sensation avoiding (AASP)                | 96        | 51.0 (15.00)  | 30-74   | 31            | 44.0 (15.00)  | 21-69   | 1008.5                   | 2.70     | 0.01**    | 0.24                 |
| Depression (HADS)                        | 122       | 10.0 (7.00)   | 0-21    | 31            | 7.0 (8.00)    | 0-19    | 1399.0                   | 2.24     | 0.03*     | 0.18                 |
| Anxiety (HADS)                           | 123       | 12.0 (6.00)   | 0-21    | 31            | 13.0 (8.00)   | 4-21    | 1886.5                   | 0.09     | 0.92      | 0.07                 |
| AQ                                       | 123       | 36.0 (11.00)  | 17-50   | 29            | 34.0 (10.00)  | 11-47   | 1468.5                   | 1.48     | 0.14      | 0.12                 |
| Alexithymia total (TAS-20)               | 147       | 66.0 (16.00)  | 30-94   | 35            | 65.0 (21.00)  | 39-83   | 2301.5                   | 0.97     | 0.33      | 0.07                 |
| Difficulty describing feelings (TAS-20)  | 153       | 20.0 (6.00)   | 7-25    | 37            | 18.0 (8.50)   | 9-24    | 2277.5                   | 1.85     | 0.06      | 0.13                 |
| Difficulty identifying feelings (TAS-20) | 150       | 24.0 (9.00)   | 7-35    | 36            | 25.0 (7.75)   | 10-35   | 2668.5                   | -0.11    | 0.91      | 0.01                 |
| Externally orientated thinking (TAS-20)  | 149       | 23.0 (7.00)   | 9-36    | 35            | 21.0 (7.00)   | 10-34   | 2182.5                   | 1.50     | 0.13      | 0.11                 |

IQR, interquartile range;  $\chi^2$  (df,  $N$ ), chi-square test (degree of freedom, number of participants);  $\phi$ , effect size  $\sqrt{(\chi^2/N)}$ ; U, statistic from Mann-Whitney test; Z, standardised statistic from Mann-Whitney test; r, effect size ( $Z/\sqrt{N}$ ); AQ, Autism Quotient; AASP, Adolescent/Adult Sensory Profile; HADS, Hospital Anxiety and Depression Scale; TAS-20, Toronto Alexithymia Scale. \*Significant at  $p \leq 0.05$ ; \*\*Significant at  $p \leq 0.01$ ; \*\*\*Bonferroni correction: significant at  $p \leq 0.003$  ( $0.05/15$ )

**Table S2.** *Co-occurring conditions across the sample.*

| Co-occurring Conditions  | Anxiety Conditions | Mood Conditions | ADHD  | Obsessive-Compulsive and Related Conditions | Other NDCs | Intellectual Disability | Psychotic Conditions | Specific Learning Difficulties | Personality Conditions | Disordered Eating Conditions | Trauma and Stressor-Related Conditions |
|--------------------------|--------------------|-----------------|-------|---------------------------------------------|------------|-------------------------|----------------------|--------------------------------|------------------------|------------------------------|----------------------------------------|
| <i>N</i>                 | 132                | 91              | 36    | 33                                          | 7          | 7                       | 6                    | 5                              | 4                      | 4                            | 4                                      |
| Percentage Frequency (%) | 69.5%              | 47.9%           | 18.9% | 17.4%                                       | 3.7%       | 3.7%                    | 3.2%                 | 2.6%                           | 2.1%                   | 2.1%                         | 2.1%                                   |

ADHD, Attention Deficit Hyperactivity Disorder; NDC, Neurodevelopmental Conditions; *N*, number of participants. Conditions within each category are listed below:

**Anxiety Conditions:** Generalised Anxiety Disorder, Mixed Anxiety Disorder, Social Anxiety, Agoraphobia

**Mood Conditions:** Depressive Disorder, Dysthymia, Atypical Depressive Disorder, Post-Natal Depression, Major Affective Disorder, Bipolar Affective Disorder

**Obsessive-Compulsive and Related Conditions:** Obsessive-Compulsive Disorder, Hoarding Disorder, Trichotillomania

**Other NDCs:** Tourette's Syndrome, Tic Disorder, Social Communication Disorder, Dyspraxia

**Psychotic Conditions:** Schizophrenia, Delusional Disorder, Psychosis

**Specific Learning Difficulties:** Dyslexia, Dyscalculia

**Personality Conditions:** Schizoid Personality Disorder, Narcissistic Personality Disorder, Anti-Social Personality Disorder, Borderline Personality Disorder

**Disordered Eating Conditions:** Anorexia, Atypical Anorexia, Bulimia

**Trauma and Stressor-Related Conditions:** Post-Traumatic Stress Disorder

**Table S3.** *Example items for all measures*

| <b>Factors</b>                                               | <b>Example items</b>                                                                 |
|--------------------------------------------------------------|--------------------------------------------------------------------------------------|
| Difficulty describing feelings                               | “It is difficult for me to find the right words for my feelings”                     |
| Difficulty identifying feelings                              | “I have feelings that I can’t quite identify”                                        |
| Externally orientated thinking                               | “I prefer talking to people about their daily activities rather than their feelings” |
| The Toronto Alexithymia Scale factors and example items [53] |                                                                                      |

| <b>Factor</b>                                                       | <b>Example items</b>                                                                  |
|---------------------------------------------------------------------|---------------------------------------------------------------------------------------|
| Low registration                                                    | “I don’t smell things that other people say they smell”                               |
| Sensation seeking                                                   | “I enjoy how it feels to move about”                                                  |
| Sensory sensitivity                                                 | “I become frustrated when trying to find something in a crowded drawer or messy room” |
| Sensation avoiding                                                  | “I avoid or wear gloves during activities that will make my hands messy”              |
| The Adolescent/Adult Sensory Profile factors and example items [54] |                                                                                       |

| <b>Factor</b>                                                            | <b>Example Items</b>            |
|--------------------------------------------------------------------------|---------------------------------|
| Depression                                                               | “I feel as if I am slowed down” |
| Anxiety                                                                  | “I feel tense or wound up”      |
| The Hospital Anxiety and Depression Scale factors and example items [57] |                                 |

| <b>Factor</b>                                      | <b>Example items</b>                                                                                |
|----------------------------------------------------|-----------------------------------------------------------------------------------------------------|
| Social skill                                       | “I would rather go to a library than a party”                                                       |
| Attention switching                                | “I would prefer to do things the same way over and over again”                                      |
| Attention to detail                                | “I usually notice car number plates or similar strings of information”                              |
| Communication                                      | “Other people frequently tell me that what I’ve said is impolite, even though I think it is polite” |
| Imagination                                        | “When I am reading a story, I find it difficult to work out the characters’ intentions”             |
| The Autism Quotient factors and example items [58] |                                                                                                     |

**Table S4.** Bivariate Spearman's rank correlation between continuous measures in the whole sample, diagnosed group, and not diagnosed group.

[illegible]

|                                             |         |                |                |                |        |                |                |                |        |                |                |                |
|---------------------------------------------|---------|----------------|----------------|----------------|--------|----------------|----------------|----------------|--------|----------------|----------------|----------------|
| 5. Externally orientated thinking (TAS-20)  | -0.26** | <b>0.60***</b> | 0.24**         | 0.26**         | -      | -              | -              | -              | -      | -              | -              | -              |
| 6. AQ                                       | 0.19    | <b>0.34***</b> | <b>0.41***</b> | <b>0.31***</b> | 0.07   | -              | -              | -              | -      | -              | -              | -              |
| 7. AASP total                               | 0.00    | <b>0.51***</b> | <b>0.44***</b> | <b>0.58***</b> | 0.09   | <b>0.46***</b> | -              | -              | -      | -              | -              | -              |
| 8. Low registration (AASP)                  | -0.11   | <b>0.50***</b> | <b>0.37***</b> | <b>0.50***</b> | 0.24*  | 0.19           | <b>0.75***</b> | -              | -      | -              | -              | -              |
| 9. Sensation seeking (AASP)                 | 0.05    | -0.27**        | -0.32**        | -0.12          | -0.23* | -              | 0.10           | 0.10           | -      | -              | -              | -              |
| 10. Sensory sensitivity (AASP)              | 0.04    | <b>0.52***</b> | <b>0.50***</b> | <b>0.60***</b> | 0.04   | <b>0.54***</b> | <b>0.87***</b> | <b>0.59***</b> | -0.20  | -              | -              | -              |
| 11. Sensation avoiding (AASP)               | 0.04    | <b>0.38***</b> | <b>0.38***</b> | <b>0.44***</b> | 0.01   | <b>0.61***</b> | <b>0.77***</b> | <b>0.33***</b> | -0.16  | <b>0.72***</b> | -              | -              |
| 12. Depression (HADS)                       | 0.00    | <b>0.35***</b> | 0.20*          | <b>0.40***</b> | 0.10   | 0.12           | <b>0.41***</b> | <b>0.47***</b> | -0.17  | <b>0.43***</b> | 0.26*          | -              |
| 13. Anxiety (HADS)                          | 0.15    | <b>0.34***</b> | <b>0.30***</b> | <b>0.52***</b> | -0.18  | 0.29**         | <b>0.57***</b> | <b>0.41***</b> | -0.12  | <b>0.58***</b> | <b>0.50***</b> | <b>0.49***</b> |
| <b>Not diagnosed</b>                        |         |                |                |                |        |                |                |                |        |                |                |                |
| 1. Age (years)                              | -       | -              | -              | -              | -      | -              | -              | -              | -      | -              | -              | -              |
| 2. TAS-20 total                             | 0.28    | -              | -              | -              | -      | -              | -              | -              | -      | -              | -              | -              |
| 3. Difficulty describing feelings (TAS-20)  | 0.21    | <b>0.75***</b> | -              | -              | -      | -              | -              | -              | -      | -              | -              | -              |
| 4. Difficulty identifying feelings (TAS-20) | 0.28    | <b>0.86***</b> | <b>0.63***</b> | -              | -      | -              | -              | -              | -      | -              | -              | -              |
| 5. Externally orientated thinking (TAS-20)  | 0.09    | <b>0.67***</b> | 0.26           | 0.31           | -      | -              | -              | -              | -      | -              | -              | -              |
| 6. AQ                                       | 0.16    | 0.44*          | 0.43*          | 0.39*          | 0.18   | -              | -              | -              | -      | -              | -              | -              |
| 7. AASP total                               | -0.01   | 0.06           | 0.05           | 0.12           | -0.01  | 0.26           | -              | -              | -      | -              | -              | -              |
| 8. Low registration (AASP)                  | -0.14   | 0.36*          | 0.31           | 0.37*          | 0.19   | 0.40*          | <b>0.64***</b> | -              | -      | -              | -              | -              |
| 9. Sensation seeking (AASP)                 | 0.08    | -0.46*         | -0.24          | -              | -0.25  | -0.27          | -0.13          | -0.40*         | -      | -              | -              | -              |
| 10. Sensory sensitivity (AASP)              | 0.15    | 0.16           | 0.16           | 0.25           | -0.02  | 0.19           | <b>0.83***</b> | 0.46**         | -0.23  | -              | -              | -              |
| 11. Sensation avoiding (AASP)               | -0.04   | 0.09           | 0.03           | 0.19           | -0.04  | 0.27           | <b>0.84***</b> | 0.45*          | -0.43* | <b>0.75***</b> | -              | -              |

|                       |       |                |       |                |      |        |       |      |       |        |       |                |
|-----------------------|-------|----------------|-------|----------------|------|--------|-------|------|-------|--------|-------|----------------|
| 12. Depression (HADS) | 0.29  | <b>0.59***</b> | 0.44* | <b>0.58***</b> | 0.23 | 0.40*  | 0.15  | 0.33 | -0.37 | 0.32   | 0.22  | -              |
| 13. Anxiety (HADS)    | 0.40* | 0.44*          | 0.34  | 0.45*          | 0.10 | 0.49** | 0.49* | 0.36 | -0.33 | 0.55** | 0.47* | <b>0.78***</b> |

---

TAS-20, Toronto Alexithymia Scale; AQ, Autism Quotient; AASP, Adolescent/Adult Sensory Profile; HADS, Hospital Anxiety and Depression scale

\*Significant at  $p \leq 0.05$ ; \*\*Significant at  $\leq 0.01$ ; \*\*\*Bonferroni correction: significant at  $p \leq 0.001$  (0.05/468)

**Table S5.** Descriptives and group comparisons of sex on key clinical measures in the whole sample.

| Clinical measure                         | Males |              |         | Females |              |         | Group comparison |       |          |      |             |
|------------------------------------------|-------|--------------|---------|---------|--------------|---------|------------------|-------|----------|------|-------------|
|                                          | N     | Median (IQR) | Range   | N       | Median (IQR) | Range   | U                | Z     | p        | r    | effect size |
| TAS-20 total                             | 121   | 65.0 (18.50) | 30-94   | 61      | 67.0 (14.00) | 33-93   | 3720.5           | 0.09  | 0.93     | 0.00 |             |
| Difficulty describing feelings (TAS-20)  | 124   | 19.0 (5.75)  | 7-25    | 66      | 20.0 (5.25)  | 9-25    | 4410.0           | 0.88  | 0.38     | 0.06 |             |
| Difficulty identifying feelings (TAS-20) | 124   | 24.0 (9.00)  | 7-25    | 62      | 25.0 (9.00)  | 7-35    | 4243.0           | 1.15  | 0.25     | 0.08 |             |
| Externally orientated thinking (TAS-20)  | 121   | 23.0 (6.50)  | 9-34    | 63      | 22.0 (8.00)  | 10-36   | 3360.5           | -1.32 | 0.19     | 0.09 |             |
| Sensory processing differences (AASP)    | 85    | 165.0 (32.0) | 126-266 | 41      | 188.0 (44.0) | 131-241 | 2371.5           | 3.28  | 0.001*** | 0.29 |             |
| Depression (HADS)                        | 104   | 10.0 (7.00)  | 1-21    | 49      | 8.0 (9.00)   | 0-17    | 3474.0           | -1.17 | 0.24     | 0.09 |             |
| Anxiety (HADS)                           | 104   | 12.0 (6.75)  | 0-21    | 50      | 13.0 (6.00)  | 4-21    | 2807.5           | 0.80  | 0.42     | 0.06 |             |

IQR, interquartile range;  $\chi^2$  (df, N), chi-square test (degree of freedom, number of participants); U, statistic from Mann-Whitney test; Z, standardised statistic from Mann-Whitney test; r, effect size ( $Z/\sqrt{N}$ ); TAS-20, Toronto Alexithymia Scale; AASP, Adolescent/Adult Sensory Profile. HADS, Hospital Anxiety and Depression Scale.

\*Significant at  $p \leq 0.05$ ; \*\*Significant at  $p \leq 0.01$ ; \*\*\*Bonferroni correction: significant at  $p \leq 0.004$  (0.05/14)



**Table S6.** Descriptives and group comparisons of depression and anxiety severity for those with severe vs lower alexithymia in the whole sample.

| Clinical measure  | Severe alexithymia ( $\geq 61$ ) |              |       | Lower Alexithymia ( $< 61$ ) |              | Group comparisons |          |          |          |                      |
|-------------------|----------------------------------|--------------|-------|------------------------------|--------------|-------------------|----------|----------|----------|----------------------|
|                   | <i>N</i>                         | Median (IQR) | Range | <i>N</i>                     | Median (IQR) | Range             | <i>U</i> | <i>Z</i> | <i>p</i> | <i>r</i> effect size |
| Depression (HADS) | 98                               | 10 (6)       | 1-20  | 51                           | 7 (8)        | 0-21              | 3306.5   | 3.24     | 0.001*** | 0.27                 |
| Anxiety (HADS)    | 99                               | 13 (6)       | 3-21  | 51                           | 11 (8)       | 0-19              | 3223.0   | 2.78     | 0.005*** | 0.23                 |

IQR, interquartile range; *U*, statistic from Mann-Whitney test; *Z*, standardised statistic from Mann-Whitney test; *r*, effect size ( $Z/\sqrt{N}$ ); HADS, Hospital Anxiety and Depression Scale.

\*\*\*Bonferroni correction: significant at  $p \leq 0.03$  ( $0.05/2$ ).

**Table S7.** Depression and anxiety severity, regressed onto alexithymia severity and sensory processing differences, controlling for sex, diagnostic status, and anxiety/depression severity.

|                                           |                                          | <b>Depression (HADS)</b><br>$\beta$ (95% CI) | <b>Anxiety (HADS)</b><br>$\beta$ (95% CI) |
|-------------------------------------------|------------------------------------------|----------------------------------------------|-------------------------------------------|
| <b>Model 1 (N=105)</b>                    | Sex                                      | -0.12 (-0.59 to 0.09)                        | 0.05 (-0.22 to 0.45)                      |
|                                           | ASC diagnostic status                    | 0.18 (0.06 to 0.77)*                         | -0.18 (-0.78 to -0.08)*                   |
|                                           | AASP                                     | 0.04 (-0.15 to 0.23)                         | <b>0.32 (0.15 to 0.51)***</b>             |
|                                           | TAS-20 total                             | 0.19 (0.02 to 0.37)*                         | 0.11 (-0.06 to 0.29)                      |
|                                           | Anxiety/Depression (HADS)                | <b>0.50 (0.30 to 0.65)***</b>                | <b>0.45 (0.29 to 0.64)***</b>             |
| <b>Model fit (<math>R^2_{adj}</math>)</b> |                                          | $F_{(5,99)} = 15.06, p < 0.001$ (40.3%)      | $F_{(5,99)} = 19.11, p < 0.001$ (46.5%)   |
| <b>Model 2 (N=107)</b>                    | Sex                                      | -0.15 (-0.66 to 0.01)                        | 0.03 (-0.28 to 0.40)                      |
|                                           | ASC diagnostic status                    | 0.16 (0.02 to 0.74)*                         | -0.19 (-0.81 to -0.10)*                   |
|                                           | AASP                                     | 0.05 (-0.16 to 0.24)                         | <b>0.34 (0.19 to 0.52)***</b>             |
|                                           | Difficulty describing feelings (TAS-20)  | 0.18 (0.02 to 0.37)*                         | 0.09 (-0.08 to 0.28)                      |
|                                           | Anxiety/Depression (HADS)                | <b>0.51 (0.32 to 0.67)***</b>                | <b>0.46 (0.31 to 0.65)***</b>             |
| <b>Model fit (<math>R^2_{adj}</math>)</b> |                                          | $F_{(5,101)} = 15.52, p < 0.001$ (40.7%)     | $F_{(5,101)} = 19.44, p < 0.001$ (46.5%)  |
| <b>Model 3 (N=107)</b>                    | Sex                                      | -0.13 (-0.61 to 0.07)                        | 0.05 (-0.21 to 0.45)                      |
|                                           | ASC diagnostic status                    | 0.21 (0.13 to 0.84)**                        | -0.14 (-0.69 to 0.01)                     |
|                                           | AASP                                     | 0.02 (-0.17 to 0.22)                         | 0.27 (0.10 to 0.45)**                     |
|                                           | Difficulty identifying feelings (TAS-20) | 0.20 (0.01 to 0.38)**                        | 0.23 (0.06 to 0.41)**                     |
|                                           | Anxiety/Depression (HADS)                | <b>0.48 (0.28 to 0.65)***</b>                | <b>0.41 (0.26 to 0.59)***</b>             |
| <b>Model fit (<math>R^2_{adj}</math>)</b> |                                          | $F_{(5,101)} = 15.36, p < 0.001$ (40.4%)     | $F_{(5,101)} = 21.58, p < 0.001$ (49.3%)  |

$\beta$  (95% CI), regression coefficient and 95% confidence interval;  $F(df, df)$ , analysis of variance statistic (regression degrees of freedom, residual degrees of freedom); ASC, Autism spectrum condition; HADS, Hospital Anxiety and Depression Scale; AQ, Autism Quotient; TAS-20, Toronto Alexithymia Scale

\*Significant at  $p \leq 0.05$ ; \*\*Significant at  $p \leq 0.01$ ; \*\*\*Bonferroni correction: significant at  $p \leq 0.002$  (0.05/30).

**Table S8.** Direct and indirect effects of difficulty describing feelings as a mediator of the relationship between sensory processing differences and depression severity, controlling for sex and diagnostic status.

| Independent variable | Dependent variable | Effect                                               | $\beta$ | SE   | LLCI | ULCI |
|----------------------|--------------------|------------------------------------------------------|---------|------|------|------|
| AASP<br>N = 107      | Depression (HADS)  | Direct                                               | 0.30*   | 0.09 | 0.11 | 0.48 |
|                      |                    | Indirect via Difficulty describing feelings (TAS-20) | 0.10*   | 0.04 | 0.03 | 0.19 |

$\beta$ , regression coefficient; SE, Standard error; LLCI, Lower level confidence interval; ULCI, Upper level confidence interval; AASP, Adolescent/Adult Sensory Profile; HADS, Hospital Anxiety and Depression Scale; TAS-20, Toronto Alexithymia Scale. Indirect SE, LLCI and ULCI were bootstrapped.

\*Significant at  $p \leq 0.05$

**Table S9.** Direct and indirect effects of difficulty identifying feelings as a mediator of the relationship between sensory processing differences and anxiety severity, controlling for sex and diagnostic status.

| Independent variable | Dependent variable | Effect                                                | $\beta$ | SE   | LLCI | ULCI |
|----------------------|--------------------|-------------------------------------------------------|---------|------|------|------|
| AASP<br>N = 107      | Anxiety (HADS)     | Direct                                                | 0.36*   | 0.10 | 0.16 | 0.55 |
|                      |                    | Indirect via Difficulty identifying feelings (TAS-20) | 0.22*   | 0.06 | 0.11 | 0.36 |

$\beta$ , regression coefficient; SE, Standard error; LLCI, Lower level confidence interval; ULCI, Upper level confidence interval; AASP, Adolescent/Adult Sensory Profile; HADS, Hospital Anxiety and Depression Scale; TAS-20, Toronto Alexithymia Scale. Indirect SE, LLCI and ULCI were bootstrapped. \*Significant at  $p \leq 0.05$
